# Supplementary material for: Plasma host protein signatures correlating with Mycobacterium tuberculosis activity prior to and during antituberculosis treatment
Source: PubMed Central journal article supplement (PMC9712643; doi:10.1038/s41598-022-25236-9), 2022-11-30
Supplement: 41598_2022_25236_MOESM2_ESM.pdf [file 41598_2022_25236_MOESM2_ESM.pdf]

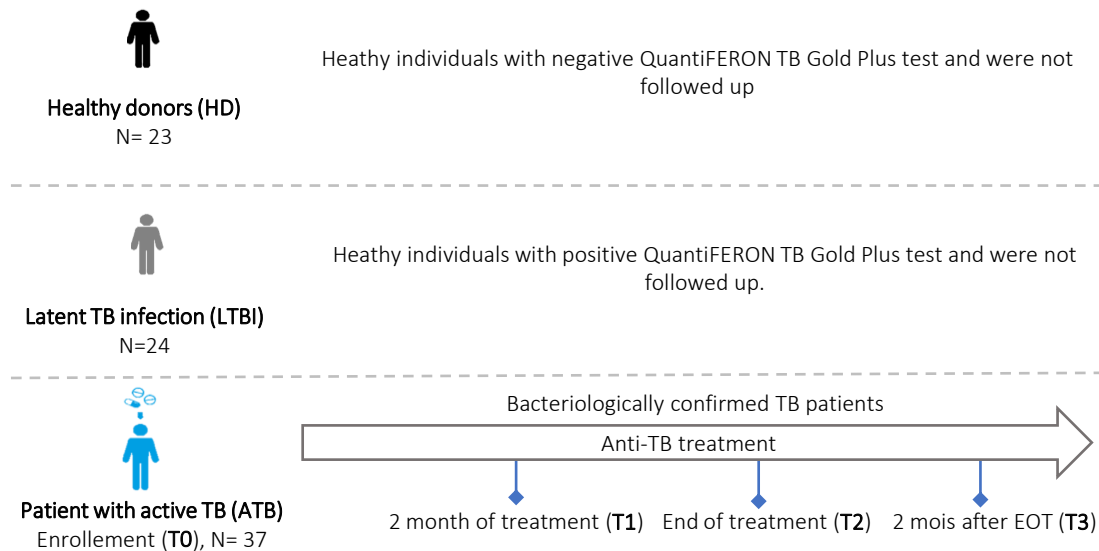

|                        | Culture |    |    |
|------------------------|---------|----|----|
|                        | T0      | T1 | T2 |
| Fast converters (N=25) | +       | -  | -  |
| Slow converters (N=12) | +       | +  | -  |

Fast converters: culture conversion between T0 and T1  
 Slow converters : culture conversion between T1 and T2

**Supplementary Figure 1. Flow diagram describing the enrollment and exclusion of participants with active TB, latent TB infection, and healthy donor participants from the different cohorts.** ATB patients were followed-up at four different time points throughout antibiotic therapy: at month 2 (T1), at the end of treatment (T2), and 2 months after treatment completion (T3). Fast converters are ATB patients with culture conversion between T0 and T1. Slow converters are ATB patients with culture conversion between T1 and T2
